# Supplementary material for: Characterizations of in situ grown ceria nanoparticles on reduced graphene oxide as a catalyst for the electrooxidation of hydrazine
Source: Royal Society of Chemistry journal article supplement (doi:10.1039/c3ta11311f), 2013-01-01
Supplement: c3ta11311f.pdf [file c3ta11311f.pdf]

# Supporting Information

## Characterizations of in situ grown ceria nanoparticles on reduced graphene oxide as catalyst for electro oxidation of hydrazine

**Manish Srivastava<sup>a</sup>, Ashok Kumar Das<sup>a</sup>, Partha Khanra<sup>a</sup>, Md. Elias Uddin<sup>a</sup>, Nam Hoon Kim<sup>a</sup>,  
Joong Hee Lee<sup>a,b\*</sup>**

<sup>a</sup>WCU Program, Department of BIN Fusion Technology, Chonbuk National University, Jeonju, Jeonbuk 561-756, Republic of Korea

<sup>b</sup>BIN Fusion Research Team, Department of Polymer & Nano Engineering, Chonbuk National University, Jeonju, Jeonbuk 561-756, Republic of Korea,

\*Correspondence to Joong Hee Lee Fax: +82 63 270 2341; Tel: +82 63 270 2342;  
[E-mail:jhl@jbnu.ac.kr](mailto:jhl@jbnu.ac.kr)

## Raman Spectra:

As shown in Fig. S-1, Raman spectra of GO, RGO and CeO<sub>2</sub>/RGO composite were fitted by multiple Lorentzian peaks [1-2]. The calculated values of D band area ( $A_D$ ) to G band area ( $A_G$ ) ratio as ( $A_D/A_G$ ) are summarized in Table S-1.

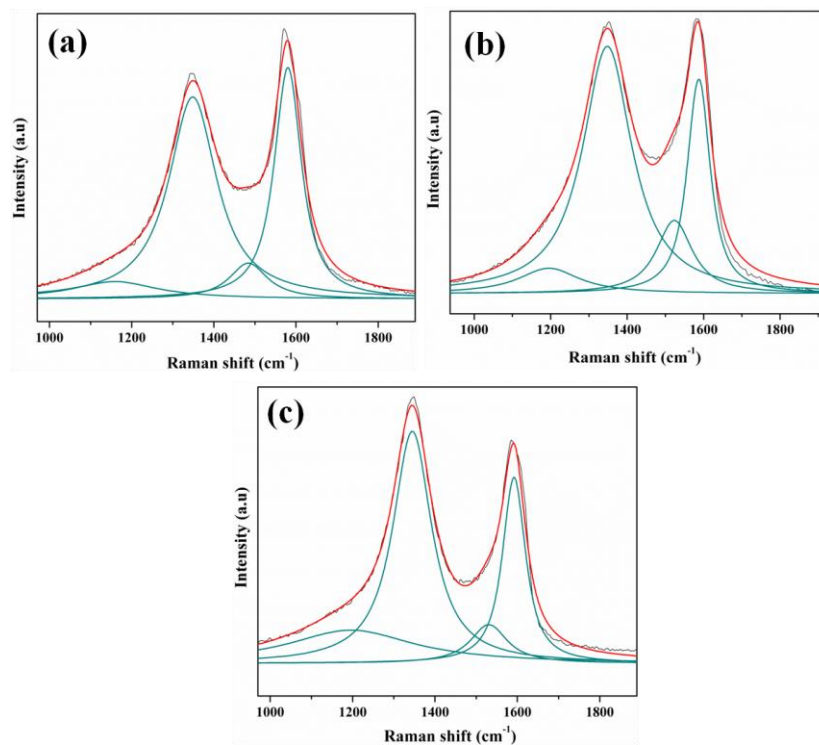

**Fig. S1.** Raman spectra of GO (a) RGO (b) and CeO<sub>2</sub>/RGO composite (c) fitted by Lorentzian function.

**Table S-1:** D and G band peak area ratio calculated for GO, RGO and CeO<sub>2</sub>/RGO samples

| Sample                | Peak area ratio ( $A_D/A_G$ ) |
|-----------------------|-------------------------------|
| GO                    | 1.58                          |
| RGO                   | 2.57                          |
| CeO <sub>2</sub> /RGO | 2.15                          |

### XPS analysis of Ce3d spectrum for CeO<sub>2</sub> and CeO<sub>2</sub>/RGO:

The quantitative analysis for concentration of the Ce<sup>+3</sup> in pure CeO<sub>2</sub> and CeO<sub>2</sub>/RGO samples has been done. As shown in Fig. S2 (a, b), high resolution XPS spectra of Ce3d core were deconvoluted by mean of Gaussian-Lorentzian shape fitting using the software. The Ce 3d XPS spectra exhibit multiple states which arise from different Ce 4f level occupancies in the final state and can be labelled according to the convention established by Burroughs et al. [3], where V and U refer to the 3d<sub>5/2</sub> and 3d<sub>3/2</sub> spin-orbital components. The peaks labelled as U, U'', U''', V, V'', and V''' are corresponding to the features of Ce<sup>+4</sup>, whereas; peaks referred to V' and U' are corresponding to Ce<sup>+3</sup>. The concentration of Ce<sup>+3</sup> was calculated by taking the ratio of the integrated peak areas corresponding to the Ce<sup>+3</sup> peaks to the total area under the whole Ce 3d spectrum. Our estimate of Ce<sup>3+</sup> concentration in pure CeO<sub>2</sub> and CeO<sub>2</sub>/RGO samples was determined using the following equation (Eq. 1) [4]:

$$Ce^{3+} = \frac{A_{v_o} + A_{v'} + A_{u_o} + A_{u'}}{A_{v_o} + A_{v'} + A_{u_o} + A_{u'} + A_v + A_{v''} + A_{v'''} + A_u + A_{u''} + A_{u'''}} \quad (1)$$

Where A denotes the area of the corresponding peaks marked as the subscript in the spectrum. The calculation exposed that the concentration of Ce<sup>3+</sup> in case of CeO<sub>2</sub>/RGO samples as ~ 14.4 % which was found to higher than concentration of Ce<sup>3+</sup> (~8.5 %) in case of pure CeO<sub>2</sub>. The relatively higher concentration of Ce<sup>3+</sup> suggests the higher oxygen vacancies in the CeO<sub>2</sub>

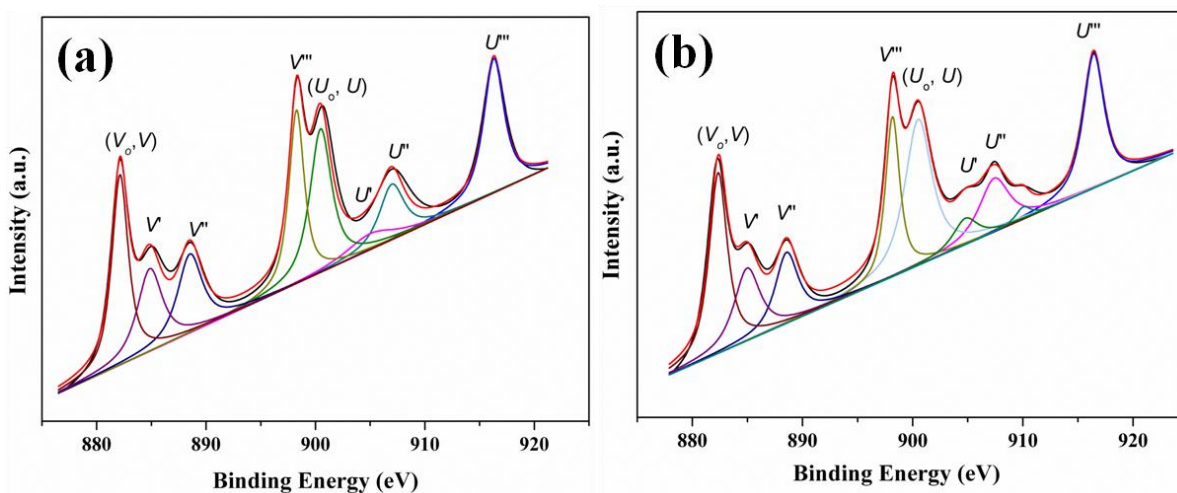

**Fig. S2.** XPS Ce3d spectra of CeO<sub>2</sub> (a) and CeO<sub>2</sub>/RGO (b)

crystal which compensate the effective negative charge associated with the trivalent ions. Therefore, the higher concentration of  $\text{Ce}^{3+}$  in case of  $\text{CeO}_2/\text{RGO}$  may provide higher catalytic activity with compare to pure  $\text{CeO}_2$ . It was suggested that the higher concentration of  $\text{Ce}^{3+}$  (higher oxygen vacancies) may arise due to the charge transfer between the graphene and  $\text{CeO}_2$  crystal. The above facts are also supported by the Raman analysis of the synthesized samples, where a shifting of the vibrational bands was observed in  $\text{CeO}_2/\text{RGO}$  with respect to pure  $\text{CeO}_2$  [5].

### Effect of scan rate

The effect of scan rate on electro oxidation of hydrazine was investigated and results are shown in Fig. S3 (a). It can be seen that, an increase in scan rate cause an increase in oxidation current and the peak potential shift towards the positive direction. This shift of the oxidation peak towards the more positive potential suggests an irreversible electrochemical reaction. A linear relationship between the peak current and the square root of the potential was also observed [Fig. S3 (b)], further suggest the reaction is mass transfer controlled.

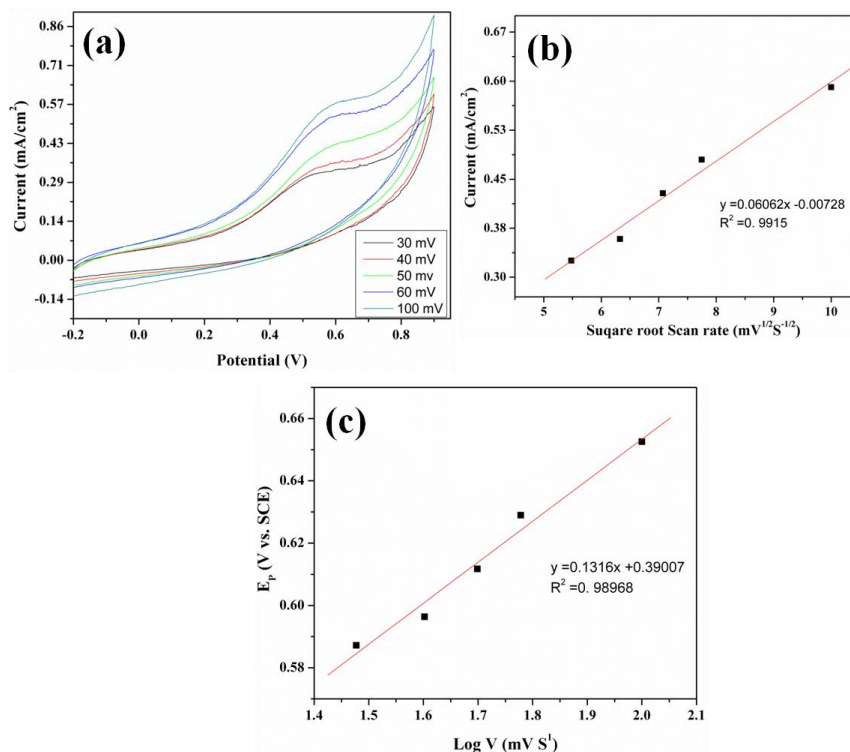

**Figure S3.** Cyclic voltammograms for  $\text{CeO}_2/\text{RGO}$  modified GCE in 3 M KOH containing 10 mM of hydrazine at different scan rate (a), plot of peak current with square root of scan rate (b), peak potential dependence on  $\log v$  for the oxidation of hydrazine at  $\text{CeO}_2/\text{RGO}$  modified GCE (c).

The rate determining step was determined by Tafel slope (b) [Fig. S3 (c)], using the following equation which is valid for a totally irreversible diffusion controlled process [6].

$$E_p = \frac{b \log v}{2} + \text{constant} \quad (2)$$

From Eq (1), slope of  $E_p$  versus  $\log v$  plot can be given as:

$$\frac{dE_p}{d \log v} = \frac{b}{2} \quad (3)$$

where,  $v$  is the scan rate and 'b' is the Tafel slope. Additionally, the Tafel slope can also be written as:

$$b = 2.3RT(\alpha_a n_\alpha F)^{-1} \quad (4)$$

Plot of  $E_p$  vs  $\log v$  [Fig. S3 (c)], yield a slope value of 0.131, therefore 'b' = 0.262. Assuming one electron transfer in the rate-determining step ( $n_\alpha = 1$ ), charge transfer coefficient ( $\alpha$ ) was calculated as 0.20 according to Eq. (4).

From the plot of  $I_p$  vs  $v^{1/2}$ , the number of electrons ( $n$ ), involved in the overall reaction can be obtained following the Eq. (5), for totally irreversible diffusion-controlled process [7-8].

$$I_p = 3.01 \times 10^5 n [(1-\alpha)n_\alpha]^{1/2} AC_b D^{1/2} v^{1/2} \quad (5)$$

where, 'A' is the electrode surface area, 'C<sub>b</sub>' is the concentration of hydrazine and 'D' is the diffusion coefficient. Using the  $D = 1.184 \times 10^{-5} \text{ cm}^2 \text{ s}^{-1}$  (calculated from the chronoamperometry, below), and from the slope of  $I_p$  vs  $v^{1/2}$ , the total number of electrons ( $n$ ) involved in the oxidation is evaluated to be 4.

The mechanism of hydrazine significantly depends on the nature of electrode and electrolyte solution. Under the solution conditions hydrazine was mainly present in its unprotonated form and the protonated form exist in small extent. In the present study it is observed that the rate determining step is one electron transfer followed by a 3-electron process to give  $N_2$  as the final product. The overall reaction for the electro oxidation of hydrazine in alkaline medium can be expressed as the following reaction [9-13]:

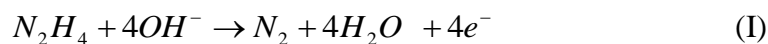

## Chronoamperometric measurement

In order to get more information about the electrocatalytic process and value of diffusion coefficient, chronoamperometry measurement was conducted. Fig. S4 (a) shows the chronoamperograms obtained for various concentrations of hydrazine on the CeO<sub>2</sub>/RGO electrode at a fixed potential of 500 mV.

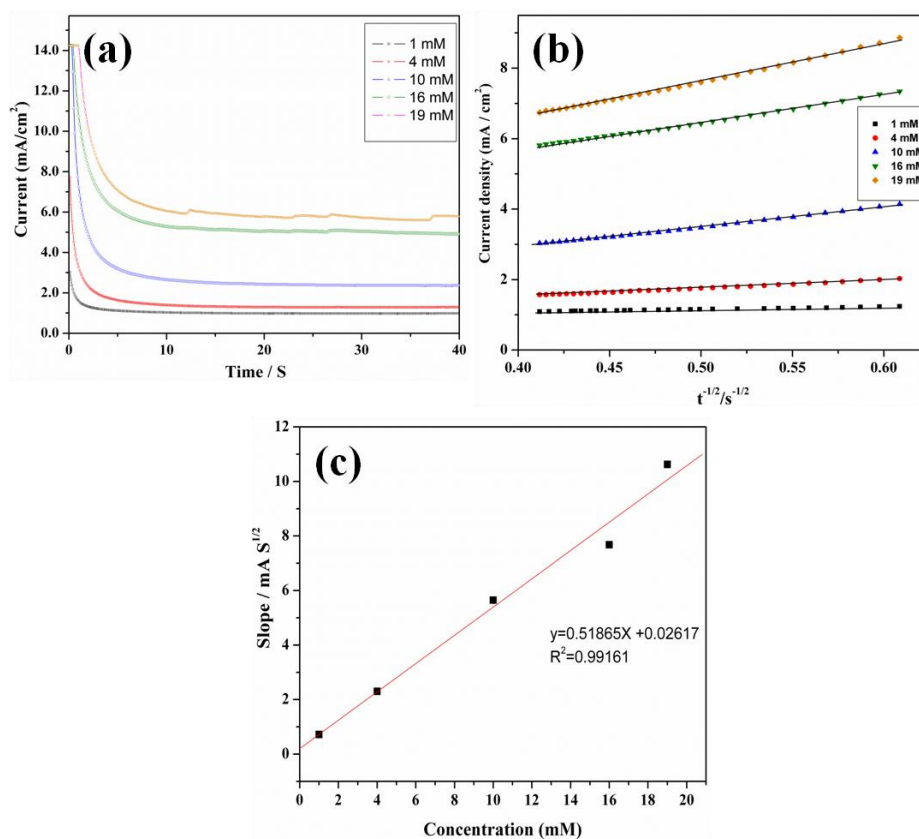

**Figure S4.** Chronoamperometric response of CeO<sub>2</sub>/RGO modified GCE in 3 M KOH containing different concentration of hydrazine (a), plot of  $I$  vs  $t^{1/2}$  obtained from chronoamperometric measurement of CeO<sub>2</sub>/RGO modified GCE at different concentration of hydrazine (b) relationship between the slope of the linear segment at different concentration of hydrazine (c).

The chronoamperograms exhibit an increase in hydrazine concentration, accompanied by an increase in anodic current. For an electroactive material, the current response under the diffusion control was described by Cottrell equation (Eq. 6):

$$I_p = nFAC_b \left( \frac{D}{\pi t} \right)^{1/2} \quad (6)$$

where,  $D$ ,  $C_b$  and  $A$  are the diffusion coefficient ( $\text{cm}^2\text{s}^{-1}$ ), concentration ( $\text{mol cm}^{-3}$ ) and area of the electrode ( $\text{cm}^2$ ), respectively. Following the Cottrell equation, the plot of  $I$  vs  $t^{-1/2}$  as shown in Fig. S4 (b) was observed to be linear. The slope of  $I$  vs  $t^{-1/2}$  obtained for different concentration of hydrazine was plotted in [Fig. S4 (c)] and the diffusion coefficient ( $D$ ) was obtained as  $1.184 \times 10^{-5} \text{ cm}^2\text{s}^{-1}$ . The obtained value of diffusion coefficient is agreed with earlier studies [6-8, 14].

## References:

- [1] A. Kaniyoor, S. Ramaprabhu, *AIP Advances*, 2012, **2**, 032183-032195.
- [2] Z. Luo, C. Cong, J. Zhang, Q. Xiong, T. Yu, *Carbon*, 2012, **50**, 4252-4258.
- [3] P. Burroughs, A. Hamnett, A. F. Orchard, G. Thornton, *J. Chem. Soc. Dalton Trans.* 1976, **17** 1686.
- [4] M. Skoda, M. Cabala, V. Chab, K.C. Prince, L. Sedlacek, T. Skala, F. Sutara, V. Matolin, *Appl. Surf. Sci.*, 2008, **254**, 4375–4379.
- [5] K. Qian, S. Lv, X. Xiao, H. Sun, J. Lu, M. Luo, W. Huang, *J Mol Catal A: Chemical* 2009, **306**, 40–47.
- [6] G. K. Nezhad, R. Jafarloo, P. S. Dorraji, *Electrochim. Acta.* 2009, **54**, 5721-5726.
- [7] M. Hosseini, M. M. Momeni, M. Faraji, *J Mol Catal A: Chemical*, 2011, **335**, 199-204.
- [8] J. Li, H. Xie, L. Chen, *Sensor Actuat B- Chem*, 2011, **153**, 239-245.
- [9] J. S. Chinchilla, K. Asazawa, T. Sakamoto, K. Yamada, H. Tanaka, P. Strasser, *J. Am. Chem. Soc.*, 2011, **133**, 5425–5431
- [10] Y. Wang, Y. Wan, D. Zhang, *Electrochem commun*, 2010, **12**, 187-190.
- [11] Wen Xia Yin, Zhou Peng Li, Jing Ke Zhu, Hai Ying Qin, *J. Power Sources*, 2008, **182**, 520–523.
- [12] Q. Yi, W. Yu, *J. Electroanal. Chem*, 2009, **633**, 159–164.
- [13] K. Yamada, K. Asazawa, K. Yasuda, T. Ioroi, H. Tanaka, Y. Miyazaki, T. Kobayashi, *J. Power Sources*, 2003, **115**, 236–242
- [14] J. Zheng, Q. Sheng, L. Li, Y. Shen, *J. Electroanal. Chem*, 2007, **611**, 155-161.
